# Supplementary material for: m6A target microRNAs in serum for cancer detection
Source: PubMed Central journal article supplement (PMC8686344; doi:10.1186/s12943-021-01477-6), 2021-12-20

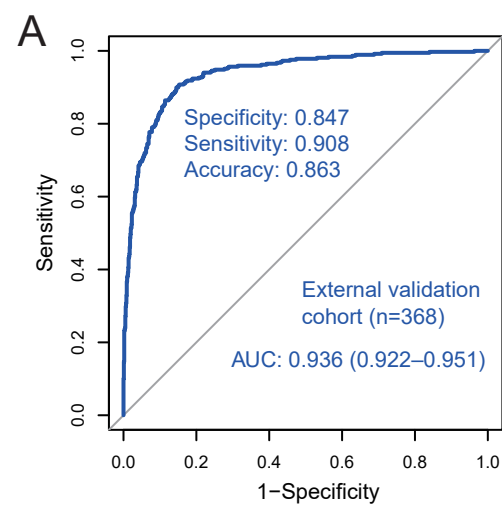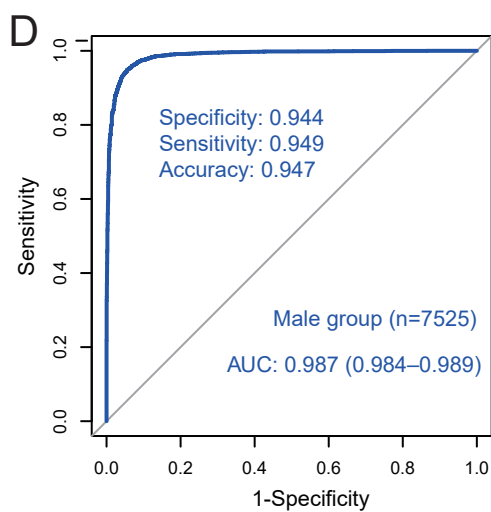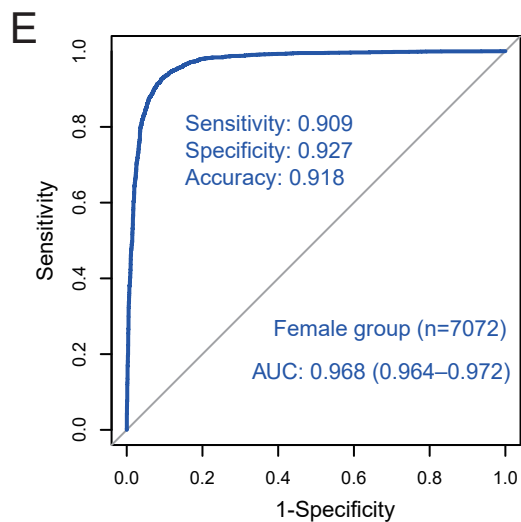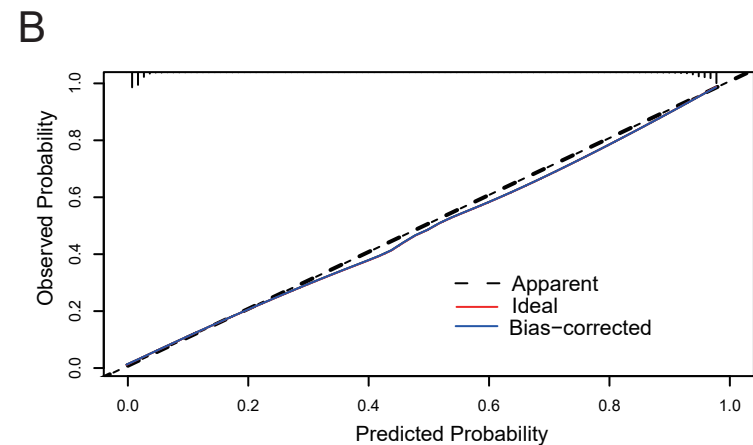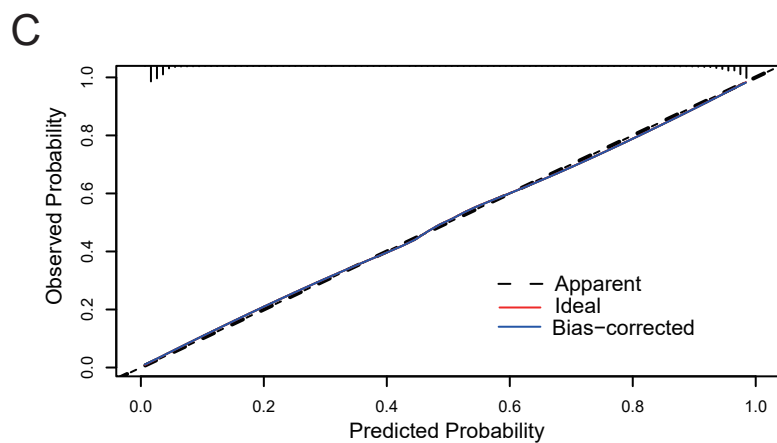

Supplement: 12943_2021_1477_MOESM1_ESM.pdf [file 12943_2021_1477_MOESM1_ESM.pdf]
